# Supplementary material for: Content of Polycyclic Aromatic Hydrocarbons in Traditionally Smoked Meat Products from North Serbia (Vojvodina)
Source: MDPI journal article supplement (doi:10.3390/fermentation10020104), 2024-02-08
Supplement: s1 [file s1]

**Table S1.** Retention time (RT), molecular mass (MW), primary (target) ion (T) and secondary (qualifier) ion (Q)

| PAHs | RT (min) | MW     | T   | Q   |
|------|----------|--------|-----|-----|
| Nap  | 4.40     | 128.06 | 128 | 129 |
| Acy  | 7.10     | 152.07 | 152 | 153 |
| Ace  | 7.36     | 154.07 | 153 | 152 |
| Fln  | 8.25     | 166.07 | 166 | 165 |
| Phe  | 10.02    | 178.08 | 178 | -   |
| Ant  | 10.11    | 178    | 178 | -   |
| Flt  | 12.13    | 202.07 | 202 | -   |
| Pyr  | 12.59    | 202.07 | 202 | -   |
| BaA  | 14.65    | 228.09 | 228 | 229 |
| Chr  | 14.76    | 228.09 | 228 | 229 |
| BbF  | 16.65    | 252.31 | 253 | 252 |
| BkF  | 16.69    | 252.31 | 253 | 252 |
| BaP  | 17.51    | 252.31 | 252 | 253 |
| IcP  | 21.99    | 276.33 | 276 | 278 |
| DhA  | 20.72    | 278.35 | 278 | 276 |
| BgP  | 20.79    | 276.33 | 276 | 278 |

**Table S2.** The average values for precision, reproducibility, accuracy, linearity, LOQ and LQD for PAHs method validation

| PAHs | Precision (%) | Reproducibility (%) | Accuracy (%) | Linearity ( $r^2$ ) <sup>a</sup> | LOQ (µg/kg) | LQD (µg/kg) |
|------|---------------|---------------------|--------------|----------------------------------|-------------|-------------|
| Nap  | 11.3          | 6.33                | 95.0         | 0.99853                          | 1.20        | 0.30        |
| Acy  | 7.91          | 7.82                | 99.0         | 0.99672                          | 1.30        | 0.29        |
| Ace  | 8.52          | 8.32                | 99.3         | 0.99768                          | 1.05        | 0.32        |
| Fln  | 2.82          | 10.2                | 100          | 0.99792                          | 1.11        | 0.30        |
| Ant  | 3.53          | 3.73                | 98.7         | 0.99603                          | 1.10        | 0.30        |
| Phe  | 4.31          | 11.4                | 85.9         | 0.99847                          | 1.18        | 0.35        |
| Flt  | 3.61          | 3.72                | 95.3         | 0.99787                          | 1.15        | 0.30        |
| BaA  | 9.44          | 8.6                 | 89.7         | 0.99825                          | 1.30        | 0.37        |
| Pyr  | 4.74          | 6.91                | 91.1         | 0.99792                          | 1.21        | 0.32        |
| Chr  | 5.33          | 8.20                | 92.5         | 0.99810                          | 1.13        | 0.34        |
| BbF  | 8.52          | 14.3                | 86.4         | 0.99408                          | 1.30        | 0.36        |
| BkF  | 3.51          | 3.32                | 94.3         | 0.99796                          | 1.21        | 0.32        |
| BaP  | 3.23          | 3.81                | 96.8         | 0.99871                          | 2.00        | 0.53        |
| DhA  | 8.72          | 11.3                | 91.2         | 0.99534                          | 1.99        | 0.51        |
| BgP  | 9.71          | 11.3                | 81.5         | 0.99781                          | 1.90        | 0.45        |
| IcP  | 9.51          | 10.3                | 85.3         | 0.99524                          | 1.91        | 0.53        |
| min  | 2.82          | 3.32                | 81.5         | 0.99853                          | 1.05        | 0.30        |
| max  | 11.3          | 14.3                | 100          | 0.99672                          | 1.81        | 0.50        |

( $r^2$ )<sup>a</sup>- Coefficient of determination; Nap-naphthalene; Acy-acenaphthylene; Ace-acenaphthene; Fln-fluorene; Ant-anthracene Phe-phenanthrene; ; Flt-fluoranthene; BaA-benz[a]anthracene; Pyr-pyrene; Chr-chrysene; BbF-benzo[b]fluoranthene; BkF-benzo[k]fluoranthene; BaP-benzo[a]pyrene; DhA-dibenzo[a,h]anthracene; BgP-benzo[ghi] -perylene; IcP-indeno[1,2,3-cd]pyrene; Limit of Quantification (LOQ) and Limit of Detection (LQD)
